# Supplementary material
Source: PubMed Central journal article supplement (PMC2597135)
Supplement: blood-2008-01-134056_1.pdf [file blood-2008-01-134056_1.pdf]

## Plasmids

pFMLL-AF9 was created by cloning the last 276 bp of human AF9 into the *Pml1* and *Xho1* sites of MSCV-pFMLL-polyL (gift from Robert Slany described previously<sup>1</sup>). pFMLL-PHD#1-AF9, pFMLL-PHD#2-AF9, pFMLL-PHD#3-AF9, pFMLL-PHDB-AF9 and pFMLL-PHD#4-AF9 were generated by cloning the above AF9 sequence into *Nsi1* and *Xho1* sites of MSCV-pFMLL-polyL followed by cloning MLL PHD fingers into *Pml1* and *Nsi1* sites.

## Western Blotting

Cells were lysed in BC-300 (20mM Tri-HCL [pH8.0], 10% glycerol, 300mM KCl, 1mM EDTA, 0.1% NP-40) separated on a 6% Tris-Glycine gel (Invitrogen, Carlsbad, CA) and transferred to nitrocellulose. Membranes were probed with polyclonal anti-flag produced in rabbit (Sigma, St. Louis, MO).

## qRT-PCR

RNA was extracted from bone marrow cells using TRIzol™ reagent (Invitrogen). cDNA was generated using Superscript III™ Reverse Transcriptase (Invitrogen) according to manufacturer's instructions. Relative quantitation of real time PCR product was performed using comparative  $\Delta\Delta C_t$  method (described in ABI Prism 7700 Sequence Detection System User Bulletin No. 2) and SYBR green fluorescent labeling and ABI 7500 PCR Detection System. Primer sequences are as follows: Flag-F 5'-GGACTACAAGGACGACGATGA-3', Flag-R 5'-ACAGCTGTGCGCCATGTT-3', Gapdh-f 5'-CCTTCCGTGTTCCCTACCC-3', Gapdh-R 5'-CTGCTTCACCACCTTCTTG-3'. *Hoxa9* and *Gapdh* were detected using Taqman™ primer probe sets from Applied Biosystems (Foster City, CA).

## Retroviral transduction and colony assays

Six week old C57Bl/6 female mice were obtained from Taconic Farms (Hudson, NY). Intraperitoneal (IP) injections were performed on mice with 150mg/kg 5-Fluorouracil (5-FU) (Pharmacia Kalamazoo, MI) 5 days before bone marrow harvest. Bone marrow is harvested, treated with NH<sub>4</sub>Cl and spin-infected with viral supernatant and polybrene on consecutive days. Cells were plated in methocult M3234 (Stem Cell Technologies, Vancouver, BC) with 15% FBS (Stem Cell Technologies), IL-3 (10ng/ml), IL-6 (10ng/ml), GM-CSF (10ng/ml), SCF (100ng/ml) (R&D Systems, Minneapolis, MN), Pen/Strep 1%, and G418 (1mg/ml) according to manufacturer protocol. Colonies were counted and plates were flooded with PBS and replated after 7-10 days of culture using the above procedure. All animal studies were approved by the University of Michigan Committee on Use and Care of Animals and Unit for Laboratory Medicine.

## Morphology Analysis and Microscopy

Liquid cultured cells were cytospun and stained with Hema 3 Stain Kit (Thermo Fisher Scientific, Waltham, MA). Images were acquired using a 100× lens and Olympus BX-51 microscope with Olympus DP controller software (Olympus, Center Valley, PA).

## Co-Immunoprecipitation

292 cells were transiently transfected with MSCV fusion plasmids using FuGene 6 (Roche, Basel, Switzerland) following manufacturer's instructions. Cells were lysed in BC-300 (described above) and incubated with M2 beads (Sigma) at 4 degrees overnight. Beads were washed three

times with BC-300 lysis buffer and proteins were eluted in loading buffer supplemented with  $\beta$ -mercaptoethanol. Lysate was run on 6% or 4-20% Tris-Glycine gels (Invitrogen) and transferred to nitrocellulose. Blots were probed with polyclonal anti-Flag produced in rabbit (Sigma) or anti-Menin (Bethyl Laboratories, Montgomery, TX).

### **Chromatin Immunoprecipitation**

ChIP experiments were performed as described previously.<sup>2</sup> Briefly, 293 cells were transiently transfected as described above. Cells were fixed with 1% formaldehyde exposed to one cycle of freeze/thaw. Cells were then lysed in ChIP lysis buffer (Upstate, Temecula, CA) supplemented with protease inhibitors. Cells were sonicated for 30 minutes using 30 sec on-off pulses with a Bioruptor (Diagenode, Sparta, NJ). Supernatant was diluted ten fold with ChIP dilution buffer (Upstate), and pre-cleared with protein-G Dynabeads (Invitrogen). Lysate was then incubated with protein-G Dynabeads conjugated with polyclonal anti-Flag antibody (Sigma) or normal rabbit IgG (Santa Cruz, Santa Cruz, CA) at four degrees for 4 hours. Beads were washed with low salt, high salt and LiCl wash buffers (Upstate) followed by a TE wash. Protein-DNA complexes were eluted by addition of elution buffer (1%SDS, 8mg/ml NaHCO<sub>3</sub>) and incubation at 42 degrees for thirty minutes. Cross links were reversed by addition of 200mM NaCl and incubation at 65 degrees overnight. RNase A (10 mg/ml) was added and DNA fragments purified using Qiaquick PCR purification kit (Qiagen, Valencia, CA). qPCR was performed as described above with the following primer sets: P1-F: CAAATCGCATTGTCGCTCTA, P1-R: CCGCAGGGATTATTACAGG.

### **Luciferase Assays**

293 cells were transiently transfected with MSCV, CMV-Renilla, and Hoxa9-LUC constructs using FuGene 6 (Roche) according to manufacturer's instructions. Cells were then serum starved in 0.5% FBS in OPTI-MEM media for 48 hours. Luciferase assays were performed using the Dual Luciferase assay kit (Promega, Madison WI) according to manufacturer's instructions. Emission was detected using a Monolight 3010 (BD Biosciences, San Jose, CA).

### **REFERENCES**

1. Slany RK, Lavau C, Cleary ML. The oncogenic capacity of HRX-ENL requires the transcriptional transactivation activity of ENL and the DNA binding motifs of HRX. *Mol Cell Biol.* 1998;18:122-129.
2. Milne TA, Dou Y, Martin ME, Brock HW, Roeder RG, Hess JL. MLL associates specifically with a subset of transcriptionally active target genes. *Proc Natl Acad Sci U S A.* 2005;102:14765-14770.
